# Supplementary material for: A compliant, self-adhesive and self-healing wearable hydrogel as epidermal strain sensor
Source: Royal Society of Chemistry journal article supplement (doi:10.1039/c8tc00157j), 2018-01-01
Supplement: c8tc00157j4.pdf [file c8tc00157j4.pdf]

## **Supplementary Information**

### **A compliant, self-adhesive and self-healing wearable hydrogel for epidermal strain sensor**

Shuqi Liu, Rongmin Zheng, Song Chen, Yunhui Wu, Haizhou Liu, Pingping Wang,  
Zhifu Deng, Lan Liu\*

College of Materials Science and Engineering, Key Lab of Guangdong Province for  
High Property and Functional Macromolecular Materials, South China University of  
Technology, Guangzhou 510641, P. R. China.

\* Corresponding author. E-mail: [psliulan@scut.edu.cn](mailto:psliulan@scut.edu.cn) Tel: +86 20-87114857.

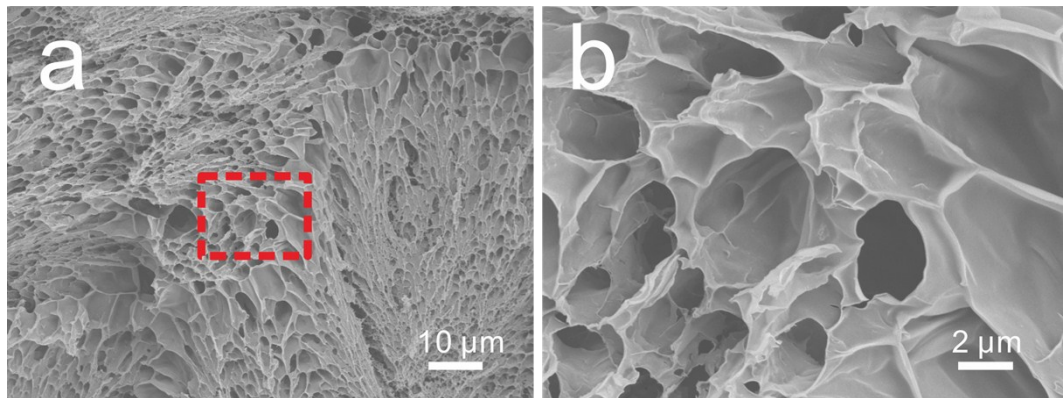

**Figure S1.** (a-b) SEM images of the PVA/PDA hydrogel after freeze drying, Fig. S1b is the higher definition of the selected area in Fig. S1a.

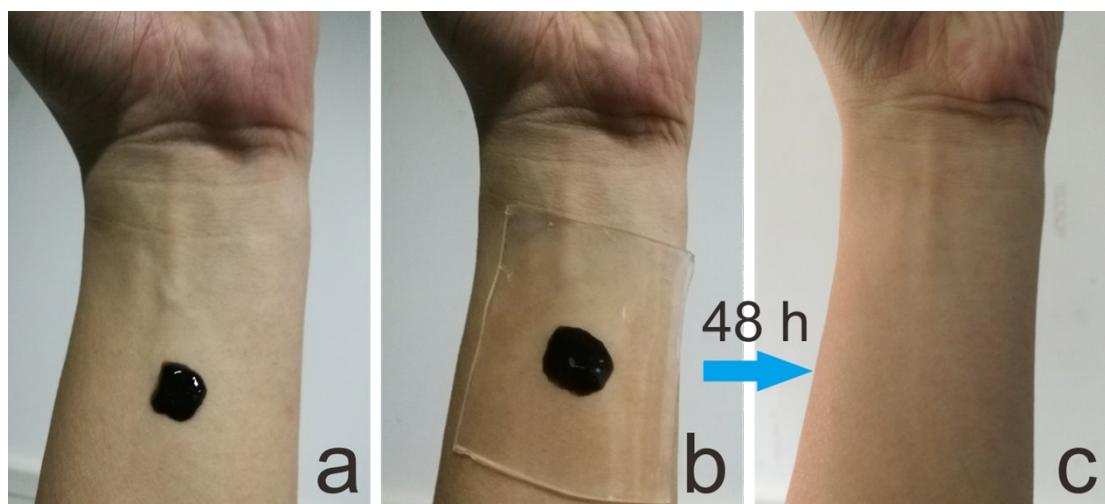

**Figure S2.** (a-c) Digital pictures of the forearm that attached by a piece of PVA/PDA hydrogel (a), fixed and encapsulated by commercial tape (b) and after peeling the hydrogel off (c).

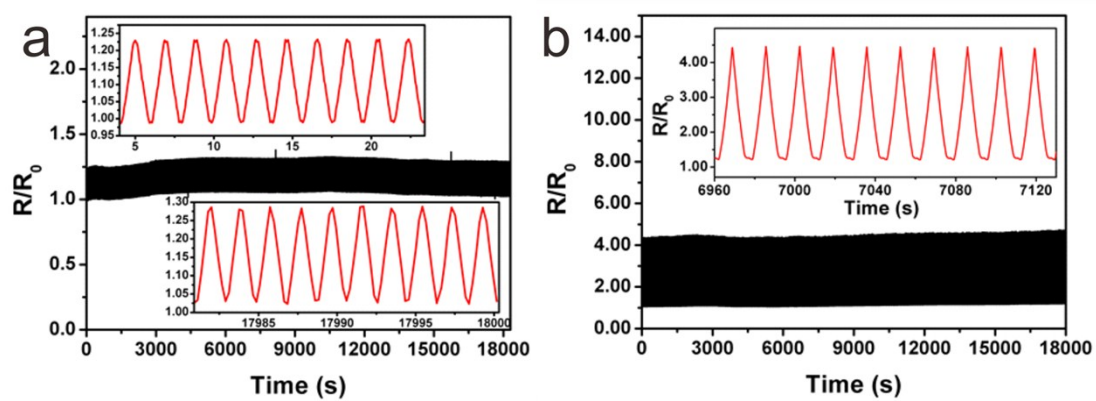

**Figure S3.** (a, b)  $R/R_0$  of the polydopamine/polyvinyl alcohol strain sensor as a function of time during cyclic stretch-relax at strain of 15% (a) and 100% (b).

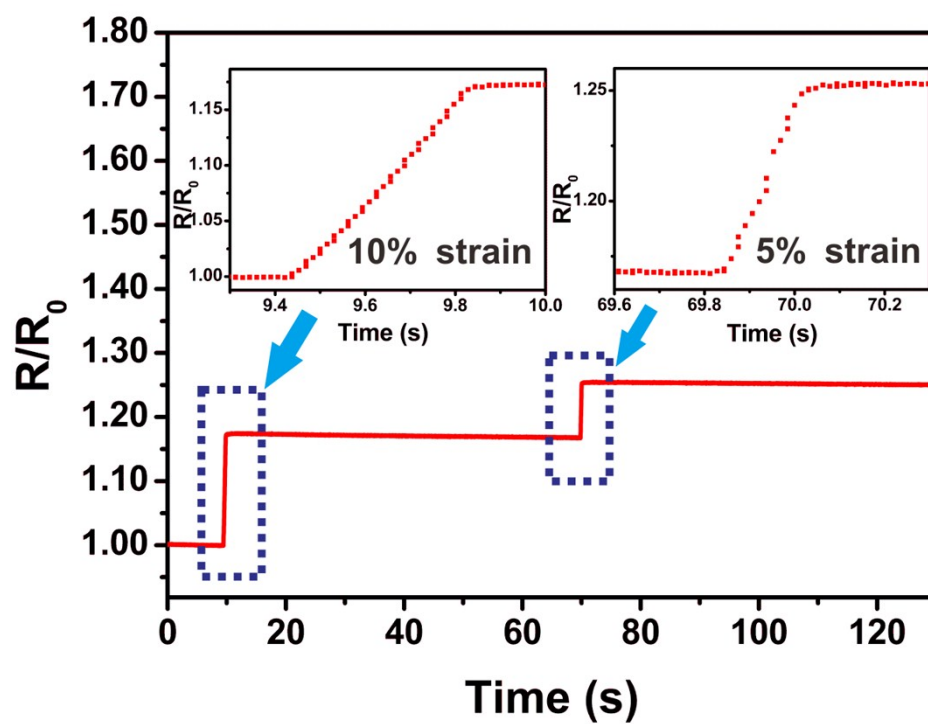

**Figure S4.** Relative resistance changes versus time for the step-strain experiment of PVA/PDA hydrogel. The inserted figures are the enlarged view of the selected area.

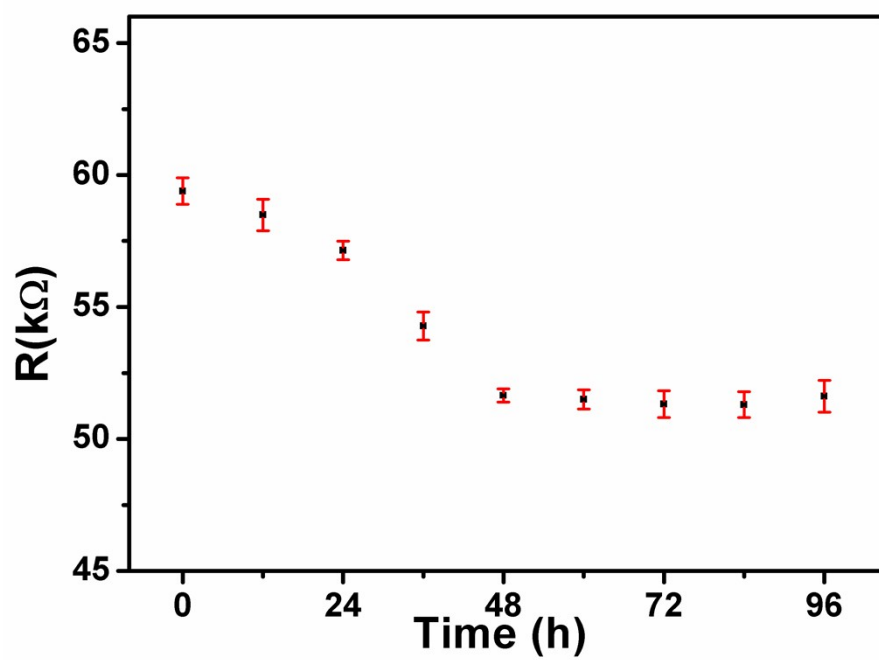

**Figure S5.** The resistance of encapsulated PVA/PDA hydrogel as a function of standing time.
